# Supplementary material
Source: ML conference proceedings conference paper supplement (https://openaccess.thecvf.com/content/WACV2022/html/Fischer_StickyLocalization_Robust_End-to-End_WACV_2022_paper.html)
Supplement: Supplementary file 2 [file Fischer_StickyLocalization_Robust_End-to-End_WACV_2022_supplemental.zip]

Archive with 2 entries (2 files):
- StickyLocalization_Qualitative_Results.mp4
- StickyLocalization_Supplementary_Material.pdf
